1 **Misleading and avoidable: design-induced biases in observational studies evaluating**  
2 **cancer screening—the example of site-specific effectiveness of screening**  
3 **colonoscopy**

4

5 **Authors:** Malte Braitmaier, Sarina Schwarz, Vanessa Didelez, Ulrike Haug

6 **Author information:**

7 Malte Braitmaier, Department of Biometry and Data Management, Leibniz Institute for  
8 Prevention Research and Epidemiology – BIPS, Bremen, Germany, ORCID: 0000-0001-7534-  
9 4068

10 Sarina Schwarz, Department of Clinical Epidemiology, Leibniz Institute for Prevention  
11 Research and Epidemiology – BIPS, Bremen, Germany, ORCID: 0000-0002-7926-2032

12 Vanessa Didelez, Department of Biometry and Data Management, Leibniz Institute for  
13 Prevention Research and Epidemiology – BIPS, Bremen, Germany & Faculty of Mathematics  
14 and Computer Sciences, University of Bremen, Bremen, Germany, ORCID: 0000-0001-8587-  
15 7706

16 Ulrike Haug, Department of Clinical Epidemiology, Leibniz Institute for Prevention Research  
17 and Epidemiology – BIPS, Bremen, Germany & Faculty of Human and Health Sciences,  
18 University of Bremen, Bremen, Germany, ORCID: 0000-0002-1886-2923

19 Corresponding author: Ulrike Haug, [haug@leibniz-bips.de](mailto:haug@leibniz-bips.de)

20

21 **Abstract**

22 **Objective:** Observational studies evaluating the effectiveness of cancer screening are often  
23 biased due to an inadequate design where I) the assessment of eligibility, II) the assignment  
24 to screening vs. no screening and III) the start of follow-up are not aligned at time zero  
25 (baseline). Such flaws can entail misleading results but are avoidable by designing the study  
26 following the principle of target trial emulation (TTE). We aimed to illustrate this by addressing  
27 the research question whether screening colonoscopy is more effective in the distal vs. the  
28 proximal colon.

29 **Methods:** Based on a large German health care database (20% population coverage), we  
30 assessed the effect of screening colonoscopy in preventing distal and proximal CRC over 12  
31 years of follow-up in 55–69-year-old persons at average CRC risk. We applied four different  
32 study designs and compared the results: cohort study with / without alignment at time zero,  
33 case control study with / without alignment at time zero.

34 **Results:** In both analyses with alignment at time zero, screening colonoscopy showed a similar  
35 effectiveness in reducing the incidence of distal and proximal CRC (cohort analysis: 32% (95%  
36 CI: 27% - 37%) vs. 28% (95% CI: 20% - 35%); case-control analysis: 27% vs. 33%). Both  
37 analyses without alignment at time zero suggested a difference in site-specific performance:  
38 Incidence reduction regarding distal and proximal CRC, respectively, was 65% (95% CI: 61%  
39 - 68%) vs. 37% (95% CI: 31% - 43%) in the cohort analysis and 77% (95% CI: 67% - 84%) vs.  
40 46% (95% CI: 25% - 61%) in the case-control analysis.

41 **Conclusions:** Our study demonstrates that violations of basic design principles can  
42 substantially bias the results of observational studies on cancer screening. In our example, it  
43 falsely suggested a much stronger preventive effect of colonoscopy in the distal vs. the  
44 proximal colon. The difference disappeared when the same data were analyzed using a TTE  
45 approach, which is known to avoid such design-induced biases.

46

## 47 **Introduction**

48 Randomized controlled trials (RCT) are the gold standard for evaluating the effectiveness of  
49 cancer screening. However, existing RCTs in this field do not answer all relevant research  
50 questions. For screening colonoscopy, for example, an RCT has recently been published  
51 (NordICC trial) demonstrating its effectiveness in reducing colorectal cancer (CRC) incidence  
52 overall [1], but it was not powered to compare the effectiveness in the distal vs. the proximal  
53 colon.

54 Complementary evidence from observational studies is therefore needed. Apart from potential  
55 confounding, there is a high risk of bias and thus of misleading results if such studies are  
56 inadequately designed. Indeed, several observational studies have reported a markedly  
57 stronger preventive effect of screening colonoscopy in the distal as compared to the proximal  
58 colon [2, 3, 4], while a cohort study designed following the principle of target trial emulation  
59 (TTE) showed a similar effectiveness of screening colonoscopy in the distal and the proximal  
60 colon [5]. We argued that the difference by site in the former studies was due to biases induced  
61 by non-alignment at “time zero”, i.e. at baseline. This means that I) the assessment of eligibility,  
62 II) the assignment to study arms and III) the start of follow-up were not aligned as they would  
63 be in an RCT and as it would be ensured in an observational study designed based on the  
64 principle of TTE [6]. Specifically, previous studies often defined exposure based on pre- or  
65 post-baseline information on colonoscopy. As we further argued, this lack of alignment in  
66 previous studies led to overestimating the effectiveness of screening colonoscopy. Due to the  
67 different age pattern of distal and proximal CRC, this bias affected distal CRC more than  
68 proximal CRC, i.e. the difference in effectiveness by site was an artefact.

69 To demonstrate this, we compared different study designs with and without alignment at time  
70 zero aiming to investigate the question of site-specific effectiveness of screening colonoscopy  
71 in reducing CRC incidence. For the two designs without alignment we used a cohort study  
72 design, where the assignment to study arms occurs *before* time zero (pre-baseline), and a  
73 nested case control study design, where the assignment to study arms occurs *after* time zero

74 (post-baseline). The current paper is part of a growing literature identifying violations of  
75 alignment at time zero as a potential source of major bias in observational studies [6, 7, 8].

## 76 **Methods**

### 77 *Data source and study population*

78 We used the German Pharmacoepidemiological Research Database (GePaRD) which  
79 comprises claims data from four statutory health insurance providers in Germany and covers  
80 about 20% of the German population [9]. In GePaRD, information on utilization of screening  
81 colonoscopy, offered in Germany to persons aged 55 or older since 2002 (since 2019 also to  
82 men aged 50-54), is distinguishable from diagnostic colonoscopy. As previously described, the  
83 data source enables the valid identification of incident CRCs [10]. Furthermore, it contains  
84 appropriate information to apply in- and exclusion criteria and to adjust for confounding as  
85 relevant to the research question on the effectiveness of screening colonoscopy in reducing  
86 CRC incidence [5]. For the present study, we used data from 2004 to 2020.

87 Based on this data source, we applied four different study designs to address the research  
88 question, specifically a cohort and a case-control study design, each with and without  
89 alignment at time zero. The study designs without alignment at time zero were inspired by  
90 published examples [2, 11, 12, 13], and were partly complemented by sensitivity analyses. For  
91 each of these four studies, persons were selected from the same population. Specifically, the  
92 source population was a cohort of persons aged 55–69 at baseline, who were continuously  
93 insured for at least three years before baseline.

### 94 *Cohort study without alignment at time zero*

95 The cohort started in 2009 (baseline). Similar to a previous study [2], individuals were assigned  
96 to the screening colonoscopy arm if they had a screening colonoscopy any time before  
97 baseline, including the baseline quarter. Individuals were assigned to the control arm if they  
98 did not undergo screening colonoscopy any time before baseline, including the baseline  
99 quarter. In a sensitivity analysis, we considered both screening and diagnostic colonoscopies

100 for the assignment to the study arms, because some of the previous studies did not distinguish  
101 between these examinations. Eligibility criteria were checked at baseline and the outcome  
102 variable (incident CRC) was assessed beginning with baseline (start of follow-up). Persons  
103 were followed up until end of study period (end of 2020), end of continuous insurance  
104 coverage, death or CRC diagnosis, whichever occurred first. We also conducted sensitivity  
105 analyses starting the cohort in 2010 and 2011, respectively.

106 When using such a study design, the assessment of eligibility and the start of follow-up are  
107 aligned, but the assignment to the screening and the control arm is based on a period *before*  
108 time zero (pre-baseline). Specifically, individuals in the colonoscopy arm had the examination  
109 in the past (i.e. they were assigned to the screening arm based on past exposure) rather than  
110 *at* time zero.

#### 111 *Cohort study with alignment at time zero*

112 As described previously [5], we emulated sequential trials for each calendar quarter from 2007  
113 to 2011. The emulation of sequential target trials makes full use of the information from  
114 longitudinal data without violating principles of study design by using pre- or post-baseline  
115 information for the assignment to study arms. At the baseline quarter of each trial, eligibility  
116 was assessed and individuals with previous screening colonoscopy or CRC diagnosis were  
117 excluded. Individuals were then assigned to the screening arm if they underwent a screening  
118 colonoscopy *in the baseline quarter* of the respective trial and to the control arm otherwise.  
119 Individuals were followed up until end of study period (end of 2020, i.e. follow-up was longer  
120 than in our previous analysis), end of continuous insurance coverage, death or CRC diagnosis,  
121 whichever occurred first. This study design made sure that assessment of eligibility criteria,  
122 assignment to the screening and control arm, and start of follow-up were aligned at time zero  
123 as would be the case in an RCT.

#### 124 *Case-control study without alignment at time zero*

125 We applied a case-control design frequently used in the published literature [11, 12, 13, 14,  
126 15, 16]. Essentially, CRC cases are identified (date of diagnosis corresponds to index date)  
127 and matched with controls free of CRC at index date. Then screening colonoscopy use *ever*  
128 *before* or within a certain time period *before* the index date is assessed in cases and controls,  
129 i.e. colonoscopies leading to CRC diagnosis are not considered as exposure in this type of  
130 study. Here, we selected all individuals from the source population entering the cohort in 2009  
131 with a CRC diagnosis in 2018-2020. For each case we matched up to five controls on age (+/-  
132 one year) and sex (sampling without replacement). The exposure variable was then defined  
133 as any screening colonoscopy between 2009 and the index date, i.e. exposure to colonoscopy  
134 use was assessed within 10-12 years *before* the index date. Colonoscopies conducted in the  
135 six months before CRC diagnosis were not considered in defining the exposure. As mentioned  
136 above, this approach corresponds to published case-control studies which ignore  
137 colonoscopies conducted as part of the diagnostic process leading to the current diagnosis  
138 [11, 12, 13, 14, 15, 16]. In general, it is a fundamental characteristic of traditional case-control  
139 studies to assess exposure before disease onset. In a sensitivity analysis, we considered both  
140 screening and diagnostic colonoscopies for the assignment to exposure groups. Again, we  
141 also conducted sensitivity analyses using the years 2010 and 2011 for cohort entry, i.e. the  
142 source population underlying this nested case-control study.

143 In the case-control design we used here (nested within a cohort), the assessment of eligibility  
144 and the start of follow-up were aligned, while the assignment to the screening and the control  
145 arm occurred *after* time zero (post-baseline) instead of *at* time zero. Note that in case-control  
146 studies not nested in a cohort, there typically are additional misalignments [11, 14]. Specifically,  
147 eligibility is assessed at index date and the start of follow-up is unclear.

#### 148 *Case-control study with alignment at time zero*

149 Following the approach described by Dickerman et al. [17], a case-control study was nested  
150 within the original cohort of sequential emulated target trials, and colonoscopy use was  
151 assessed at baseline of each emulated trial. We included CRC patients with an incident CRC

152 diagnosis at any point during follow-up (until 2020) and then used risk set sampling to match  
153 up to five controls to each case. We sampled matched controls with replacement, i.e. the same  
154 control could be matched to more than one case. Matching variables were the same as above.  
155 The key difference to the case-control study without alignment is that exposure assignment  
156 was based on information available at the start of the emulated trial, i.e. at time zero, instead  
157 of information occurring after time zero. This approach has been shown to avoid self-inflicted  
158 biases in the same way as a prospective study using TTE [17].

### 159 *Data analysis*

160 For the cohort studies, we estimated cumulative incidence functions (CIF) via pooled logistic  
161 regressions, which were adjusted for baseline confounders via inverse probability of treatment  
162 weighting. Effects were estimated as adjusted relative risks (RR) at the end of follow-up based  
163 on these CIFs. As previously shown, adjustment yielded satisfactory covariate balance and a  
164 negative control analysis did not indicate any residual confounding [5]. Confidence intervals  
165 were estimated via person-level bootstrap. For the case-control studies, effects were estimated  
166 as adjusted odds ratios (ORs) obtained via conditional logistic regression. For the case-control  
167 analysis with alignment, no confidence intervals could be obtained due to computational  
168 limitations: The emulation of sequential trials with repeated cohort entry would require  
169 bootstrapping, where matching is repeated for every bootstrap sample, resulting in run times  
170 of several months.

## 171 **Results**

### 172 *Cohort study without alignment at time zero*

173 We selected a random sample of 200,000 individuals in the control arm and 200,000  
174 individuals in the screening colonoscopy arm. The adjusted relative risk after 12 years of follow-  
175 up was 0.35 for distal CRC and 0.63 for proximal CRC (Table 1). The adjusted cumulative  
176 incidence curves are given in Fig. 1. As shown in Supplement 1, results were similar when the  
177 year 2010 or the year 2011 was used as baseline. In sensitivity analyses considering both

178 screening and diagnostic colonoscopies as exposure, the adjusted 12-year relative risk was  
179 0.40 for distal CRC and 0.66 for proximal CRC (Supplement 2).

#### 180 *Cohort study with alignment at time zero*

181 Overall, 192,054 persons were included in the screening colonoscopy arm. The 5% random  
182 sample (restriction due to computational limitations) of controls assigned to the no screening  
183 arm included 116,452 persons (1,241,071 non-unique). The adjusted relative risk after 12  
184 years of follow-up was 0.68 for distal CRC and 0.72 for proximal CRC (Table 1). Figure 1  
185 shows the adjusted cumulative incidence curves for distal and proximal CRC. The distribution  
186 of screen-detected and post-colonoscopy CRCs (i.e. non-screen-detected CRCs) by site is  
187 shown in Supplement 6.

#### 188 *Case-control study without alignment at time zero*

189 Overall, 446 cases with distal CRC matched to 2,230 controls and 302 cases with proximal  
190 CRC matched to 1,510 controls were included. The adjusted ORs for distal and proximal CRC  
191 were 0.23 and 0.54, respectively (Table 2). When the year 2010 or the year 2011 was used to  
192 define the source population, the difference by site was similar (Supplement 1). The sensitivity  
193 analysis considering both screening and diagnostic colonoscopy as exposure yielded similar  
194 results; the adjusted ORs for distal and proximal CRC were 0.20 for distal CRC and 0.44 for  
195 proximal CRC, respectively (Supplement 2).

#### 196 *Case-control study with alignment at time zero*

197 Overall, 8,382 cases with distal CRC matched to 40,925 controls and 4,463 cases with  
198 proximal CRC matched to 22,175 controls were included. The adjusted ORs for distal and  
199 proximal CRC were 0.73 and 0.67, respectively (Table 2).

## 200 **Discussion**

201 To the best of our knowledge, our study is the first to systematically compare different study  
202 designs to assess the effectiveness of screening colonoscopy in reducing CRC incidence in



203 the distal vs. the proximal colon. Our cohort and case-control analyses with alignment at time  
204 zero showed no relevant difference in the effectiveness by site. Using study designs without  
205 alignment at time zero led to an overestimation of the effectiveness of screening colonoscopy  
206 overall. The overestimation affected distal CRCs considerably more than proximal CRCs, i.e.  
207 purely by design there appeared to be a difference in effectiveness by site. This finding held  
208 up in sensitivity analyses varying data years and the type of examinations considered for the  
209 exposure definition (only screening or also diagnostic colonoscopy). Our findings demonstrate  
210 that the difference in the effectiveness of colonoscopy by site reported by previous  
211 observational studies was due to bias introduced by inadequate study design.

212 As illustrated in Supplement 3 using directed acyclic graphs, the bias underlying studies using  
213 pre-baseline information on colonoscopy for the assignment to study arms can be expressed  
214 as a form of collider stratification bias [18, 19]. To give an intuitive explanation, let us revisit  
215 the study by Guo et al. [2, 5]: At baseline, patients were asked about past colonoscopy use  
216 and—based on this information—assigned as exposed or unexposed to colonoscopy. Persons  
217 reporting a prior CRC diagnosis at baseline were excluded [2]. Given that colonoscopy is one  
218 of the main tools by which CRC is diagnosed, this process removes individuals with previously  
219 diagnosed CRC from the exposed group, i.e. it enriches the exposed group with individuals  
220 who are known to be free of CRC. No such selection process takes place in the unexposed  
221 group. This leads to a lower prevalence of preclinical CRC at baseline in the exposed as  
222 compared to the unexposed group. As a consequence, this selection reduces the number of  
223 CRCs occurring during follow-up in the exposed group as compared to the unexposed group  
224 and thus leads to overestimation of the effect of screening on CRC incidence. As the vast  
225 majority of CRCs diagnosed at an age when persons are typically included into screening  
226 studies are in the distal colon [20] while proximal CRCs become more common at older age,  
227 this bias mainly affects results for distal CRC, i.e. as mentioned above there appeared to be a  
228 difference in effectiveness by site purely by design. We note that in addition to the initial  
229 exposure assignment, Guo et al. also used an updated exposure variable in a Cox model with

230 time-dependent covariates. However, this does not correct the initial selection issue at the start  
231 of follow-up.

232 The above argument applies to studies using pre-baseline information for the assignment to  
233 exposure groups. Many other studies used post-baseline information for the assignment to  
234 exposure groups, also inducing bias. We illustrated this by the case-control study without  
235 alignment at time zero: Whenever after baseline CRC is detected in a person at his or her first  
236 colonoscopy, as is the case for most screen-detected CRCs, this person is assigned to the  
237 unexposed group as there was no previous colonoscopy and the actual colonoscopy detecting  
238 the CRC is not considered as prior exposure. This enriches the unexposed group with CRCs  
239 and thus leads to overestimation of the effectiveness of screening. As the majority of screen-  
240 detected CRCs are in the distal colon, this bias predominantly affects CRCs in the distal colon  
241 and thus leads to an artificial difference in the effectiveness of colonoscopy by site (see also  
242 Supplement 4). In our case-control study design embedded in an emulated target trial with  
243 alignment at time zero, in which screen-detected CRCs are correctly assigned, no relevant  
244 difference in the effectiveness of colonoscopy by site was observed. Of note, misalignment  
245 due to post-baseline exposure assignment is typical of but not limited to case-control designs  
246 on cancer screening. It can also occur in inadequately designed cohort studies and is not  
247 overcome by using a time-varying exposure variable in a hazard model. This is explained in  
248 more detail in Supplement 5 based on the example of the study by Nishihara et al. [3]

249 In summary and more generally, both study designs without alignment at time zero have in  
250 common that there are mechanisms that lead to inappropriate consideration of screen-  
251 detected CRCs, i.e. in the screening arm there was no peak in CRC incidence immediately  
252 after baseline as it would be the case in an RCT. Of course, this overestimates the impact of  
253 screening on CRC incidence, particularly for distal CRC, as illustrated in Figure 1. The flawed  
254 approaches ignore the fact that a screening colonoscopy sometimes comes too late to prevent  
255 CRC. Following the publication of the NordICC study, there was a discussion whether it is  
256 appropriate to include persons with preclinical CRC, causing the peak at baseline, in a

257 prevention trial [21, 22]. However, from a public health perspective, it is important to also take  
258 into account CRCs that are not prevented by screening in order to avoid overestimating the  
259 effectiveness of CRC screening at the population level. Apart from this, it should be noted that  
260 studies without alignment at time zero do not provide a valid answer to the question regarding  
261 the size of the preventive effect of colonoscopy in persons free of CRC at baseline.

262 It should be noted that, although we focus our discussion on biases most relevant for site-  
263 specific effectiveness of screening colonoscopy, misalignment at time zero should also be  
264 avoided for many other reasons. Rasouli et al. [23] demonstrated that time related issues such  
265 as prevalent user bias or time-varying confounding are a threat to case-control designs not  
266 embedded in an emulated target trial. Also Dickerman et al. showed—based on case-control  
267 studies investigating the impact of statins on CRC risk—the biases inherent to traditional case-  
268 control studies and the potential of avoiding bias and wrong conclusions if the study is designed  
269 following the principle of TTE [17]. Similarly, there are many examples of biases other than  
270 those we discussed here that are inherent to cohort studies without alignment at time zero [8].

271 Our findings have several implications. First, regarding research on CRC screening, previous  
272 studies suggesting a lower effectiveness of colonoscopy in the proximal colon stimulated a  
273 search for reasons that may explain the occurrence of post-colonoscopy CRCs specifically in  
274 the proximal colon. It was suggested that one main reason relates to sessile serrated lesions  
275 as they are more difficult to detect and more often occur in the proximal colon [24]. While we  
276 do not question the important role of these lesions, our findings may encourage a broadening  
277 of the discussion of potential reasons leading to post-colonoscopy CRCs. Indeed, in our  
278 emulated target trial on screening colonoscopy, the proportion of post-colonoscopy CRCs  
279 located in the distal vs. the proximal colon was rather similar (Supplement 6). A one-sided  
280 focus on lesions that occur more frequently in the proximal colon therefore seems too narrow  
281 regarding the identification of lesions possibly leading to post-colonoscopy CRCs.

282 Our results also have implications beyond the specific research question of our study.  
283 Observational data are often used to evaluate the effectiveness of cancer screening. They

284 represent a valuable data source to complement RCT evidence in this field, as RCTs on cancer  
285 screening are scarce, were often conducted many years ago and are typically not powered to  
286 estimate, for example, subgroup-specific effects or differences by cancer subtype. However,  
287 our study illustrates that—in addition to appropriate control of confounding—it is of key  
288 importance to design these studies in a way to ensure alignment at time zero. This means that  
289 assessment of eligibility, assignment to the screening and control arm and start of follow-up  
290 must be aligned. Otherwise, there is a high risk of bias.

291 Specific strengths of our study include the systematic comparison of different study designs as  
292 well as the comprehensive sensitivity analyses. Given that all analyses were conducted using  
293 the same data source and referred to the same setting, there is no heterogeneity regarding,  
294 for example, the study variables or setting-related factors such as the uptake of surveillance  
295 colonoscopy or colonoscopy quality. This strengthens our conclusion that differing results of  
296 the analyses with and without alignment at time zero are exclusively due to the study design.

297 It should be noted that our findings apply to the population aged 55-69, covering the typical  
298 screening age range of CRC screening. Whether screening colonoscopy is equally effective in  
299 the distal and proximal colon in older age groups cannot be answered by our study, nor did we  
300 address the endpoint CRC mortality. These research questions were beyond our study's  
301 scope, as our primary objective was to illustrate the relevance of design-induced biases and  
302 the possibility to avoid them using TTE, exemplified by investigating site-specific effectiveness  
303 of screening colonoscopy in reducing CRC incidence.

304 In conclusion, our study demonstrates that violation of alignment at time zero can substantially  
305 bias the results of observational studies on cancer screening. In our example, it falsely  
306 suggested an almost doubled preventive effect of colonoscopy in the distal vs. the proximal  
307 colon. The difference disappeared when the same data were analyzed using a TTE approach,  
308 which is known to avoid design-induced biases.

309

## 310 References

- 311 1 Bretthauer M, Loberg M, Wieszczy P, Kalager M, Emilsson L, Garborg K, *et al.* Effect of  
312 colonoscopy screening on risks of colorectal cancer and related death. *N Engl J Med* 2022;**387**:1547-  
313 56.
- 314 2 Guo F, Chen C, Holleczeck B, Schottker B, Hoffmeister M, Brenner H. Strong reduction of  
315 colorectal cancer incidence and mortality after screening colonoscopy: prospective cohort study from  
316 Germany. *Am J Gastroenterol* 2021;**116**:967-75.
- 317 3 Nishihara R, Wu K, Lochhead P, Morikawa T, Liao X, Qian ZR, *et al.* Long-term colorectal-  
318 cancer incidence and mortality after lower endoscopy. *N Engl J Med* 2013;**369**:1095-105.
- 319 4 Brenner H, Stock C, Hoffmeister M. Effect of screening sigmoidoscopy and screening  
320 colonoscopy on colorectal cancer incidence and mortality: systematic review and meta-analysis of  
321 randomised controlled trials and observational studies. *BMJ* 2014;**348**:g2467.
- 322 5 Braitmaier M, Schwarz S, Kollhorst B, Senore C, Didelez V, Haug U. Screening colonoscopy  
323 similarly prevented distal and proximal colorectal cancer: a prospective study among 55-69-year-  
324 olds. *J Clin Epidemiol* 2022;**149**:118-26.
- 325 6 Garcia-Albeniz X, Hsu J, Hernan MA. The value of explicitly emulating a target trial when using  
326 real world evidence: an application to colorectal cancer screening. *Eur J Epidemiol* 2017;**32**:495-500.
- 327 7 Wakabayashi R, Hirano T, Laurent T, Kuwatsuru Y, Kuwatsuru R. Impact of "time zero" of  
328 Follow-Up Settings in a Comparative Effectiveness Study Using Real-World Data with a Non-user  
329 Comparator: Comparison of Six Different Settings. *Drugs Real World Outcomes* 2023;**10**:107-17.
- 330 8 Hernan MA, Sauer BC, Hernandez-Diaz S, Platt R, Shrier I. Specifying a target trial prevents  
331 immortal time bias and other self-inflicted injuries in observational analyses. *J Clin Epidemiol*  
332 2016;**79**:70-5.
- 333 9 Haug U, Schink T. German Pharmacoepidemiological Research Database (GePaRD). In:  
334 Sturkenboom M, Schink T, eds. *Databases for pharmacoepidemiological research*. Cham,  
335 Switzerland: Springer, 2021:119-24.
- 336 10 Schwarz S, Hornschuch M, Pox C, Haug U. Colorectal cancer after screening colonoscopy: 10-  
337 year incidence by site and detection rate at first repeat colonoscopy. *Clin Transl Gastroenterol*  
338 2023;**14**:e00535.
- 339 11 Baxter NN, Goldwasser MA, Paszat LF, Saskin R, Urbach DR, Rabeneck L. Association of  
340 colonoscopy and death from colorectal cancer. *Ann Intern Med* 2009;**150**:1-8.
- 341 12 Mulder SA, van Soest EM, Dieleman JP, van Rossum LG, Ouwendijk RJ, van Leerdam ME, *et al.*  
342 Exposure to colorectal examinations before a colorectal cancer diagnosis: a case-control study. *Eur J*  
343 *Gastroenterol Hepatol* 2010;**22**:437-43.
- 344 13 Doubeni CA, Weinmann S, Adams K, Kamineni A, Buist DS, Ash AS, *et al.* Screening  
345 colonoscopy and risk for incident late-stage colorectal cancer diagnosis in average-risk adults: a  
346 nested case-control study. *Ann Intern Med* 2013;**158**:312-20.
- 347 14 Brenner H, Chang-Claude J, Seiler CM, Rickert A, Hoffmeister M. Protection from colorectal  
348 cancer after colonoscopy: a population-based, case-control study. *Ann Intern Med* 2011;**154**:22-30.
- 349 15 Kahi CJ, Pohl H, Myers LJ, Mobarek D, Robertson DJ, Imperiale TF. Colonoscopy and colorectal  
350 cancer mortality in the veterans affairs health care system: a case-control study. *Ann Intern Med*  
351 2018;**168**:481-8.
- 352 16 Baxter NN, Warren JL, Barrett MJ, Stukel TA, Doria-Rose VP. Association between  
353 colonoscopy and colorectal cancer mortality in a US cohort according to site of cancer and  
354 colonoscopist specialty. *J Clin Oncol* 2012;**30**:2664-9.
- 355 17 Dickerman BA, Garcia-Albeniz X, Logan RW, Denaxas S, Hernan MA. Emulating a target trial in  
356 case-control designs: an application to statins and colorectal cancer. *Int J Epidemiol* 2020;**49**:1637-  
357 46.
- 358 18 Greenland S. Quantifying biases in causal models: classical confounding vs collider-  
359 stratification bias. *Epidemiology* 2003;**14**:300-6.
- 360 19 Hernan MA, Hernandez-Diaz S, Robins JM. A structural approach to selection bias.  
361 *Epidemiology* 2004;**15**:615-25.

- 362 20 Meza R, Jeon J, Renehan AG, Luebeck EG. Colorectal cancer incidence trends in the United  
363 States and United kingdom: evidence of right- to left-sided biological gradients with implications for  
364 screening. *Cancer Res* 2010;**70**:5419-29.
- 365 21 Song M, Bretthauer M. Interpreting epidemiologic studies of colonoscopy screening for  
366 colorectal cancer prevention: understanding the mechanisms of action is key. *Eur J Epidemiol*  
367 2023;**38**:929-31.
- 368 22 Brenner H, Heisser T, Cardoso R, Hoffmeister M. When gold standards are not so golden:  
369 prevalence bias in randomized trials on endoscopic colorectal cancer screening. *Eur J Epidemiol*  
370 2023;**38**:933-7.
- 371 23 Rasouli B, Chubak J, Floyd JS, Psaty BM, Nguyen M, Walker RL, *et al.* Combining high quality  
372 data with rigorous methods: emulation of a target trial using electronic health records and a nested  
373 case-control design. *BMJ* 2023;**383**:e072346.
- 374 24 Crockett SD, Nagtegaal ID. Terminology, molecular features, epidemiology, and management  
375 of serrated colorectal neoplasia. *Gastroenterology* 2019;**157**:949-66 e4.

376

377

378 **Statements & Declarations**

379 ***Funding***

380 BIPS intramural funding

381 ***Competing interests***

382 MB, SS, VD and UH are working at an independent, non-profit research institute, the Leibniz  
383 Institute for Prevention Research and Epidemiology – BIPS. Unrelated to this study, BIPS  
384 occasionally conducts studies financed by the pharmaceutical industry. These are post-  
385 authorization safety studies (PASS) requested by health authorities. The design and conduct  
386 of these studies as well as the interpretation and publication are not influenced by the  
387 pharmaceutical industry. The study presented was not funded by the pharmaceutical industry  
388 and was performed in line with the ENCePP Code of Conduct.

389 ***Author contributions***

390 MB: Conceptualization, data curation, formal analysis, investigation, methodology, software,  
391 visualization, writing – original draft, writing – review and editing; SS: Conceptualization,  
392 investigation, writing – review and editing; VD: Conceptualization, investigation, methodology,  
393 supervision, writing – review and editing; UH: Conceptualization, funding acquisition,  
394 investigation, methodology, project administration, resources, supervision, writing – original  
395 draft, writing – review and editing.

396 ***Ethics approval & consent to participate***

397 In Germany, the utilisation of health insurance data for scientific research is regulated by the  
398 Code of Social Law. All involved health insurance providers as well as the German Federal  
399 Office for Social Security and the Senator for Health, Women and Consumer Protection in  
400 Bremen as their responsible authorities approved the use of GePaRD data for this study.  
401 Informed consent for studies based on claims data is required by law unless obtaining consent  
402 appears unacceptable and would bias results, which was the case in this study. According to  
403 the Ethics Committee of the University of Bremen studies based on GePaRD are exempt from  
404 institutional review board review.

405 ***Data availability***

406 As we are not the owners of the data we are not legally entitled to grant access to the data of  
407 the German Pharmacoepidemiological Research Database. In accordance with German data  
408 protection regulations, access to the data is granted only to employees of the Leibniz Institute  
409 for Prevention Research and Epidemiology – BIPS on the BIPS premises and in the context  
410 of approved research projects. Third parties may only access the data in cooperation with BIPS  
411 and after signing an agreement for guest researchers at BIPS.

412 ***Acknowledgements***

413 We thank Anja Gabbert and Inga Schaffer for the programming of analysis datasets.

414

415 **Tables and Figures**

416

417 *Table 1: Results of cohort study designs without and with alignment at time zero (adjusted for*  
 418 *baseline covariates).*

|                                              | <b>Control group</b> | <b>Screening group</b> | <b>Adjusted relative risk</b> | <b>(95% CI)</b> |
|----------------------------------------------|----------------------|------------------------|-------------------------------|-----------------|
| <b>Design without alignment at time zero</b> |                      |                        |                               |                 |
| Number at risk                               | 200,000              | 200,000                |                               |                 |
| Number of CRC cases                          |                      |                        |                               |                 |
| Distal CRC                                   | 2,472                | 829                    | 0.35                          | (0.32-0.39)     |
| Proximal CRC                                 | 1,290                | 823                    | 0.63                          | (0.57-0.69)     |
| <b>Design with alignment at time zero</b>    |                      |                        |                               |                 |
| Number at risk                               | 1,241,071            | 192,054                |                               |                 |
| Number of CRC cases                          |                      |                        |                               |                 |
| Distal CRC                                   | 16,750               | 1,678                  | 0.68                          | (0.63-0.73)     |
| Proximal CRC                                 | 8,548                | 919                    | 0.72                          | (0.65-0.80)     |

419

420

421 *Table 2: Results of case-control study designs without and with alignment at time zero.*

| <b>Site</b>                                  | <b>Case status</b> |                 | <b>Adjusted OR (95% CI)<sup>§</sup></b> |
|----------------------------------------------|--------------------|-----------------|-----------------------------------------|
|                                              | <b>Cases</b>       | <b>Controls</b> |                                         |
| <b>Design without alignment at time zero</b> |                    |                 |                                         |
| Number of distal CRCs / controls             | 446                | 2,230           |                                         |
| Thereof exposed                              | 36                 | 653             | 0.23 (0.16-0.33)                        |
| Number of proximal CRCs / controls           | 302                | 1,510           |                                         |
| Thereof exposed                              | 54                 | 434             | 0.54 (0.39-0.75)                        |
| <b>Design with alignment at time zero</b>    |                    |                 |                                         |
| Number of distal CRCs / controls             | 8,382              | 40,925          |                                         |
| Thereof exposed                              | 799                | 5,695           | 0.73                                    |
| Number of proximal CRCs / controls           | 4,463              | 22,175          |                                         |
| Thereof exposed                              | 409                | 3,013           | 0.67                                    |

<sup>§</sup>: Confidence intervals could not be obtained for the case-control analysis with alignment at time zero due to computational limitation (see methods section).

OR: Odds Ratio

422

423



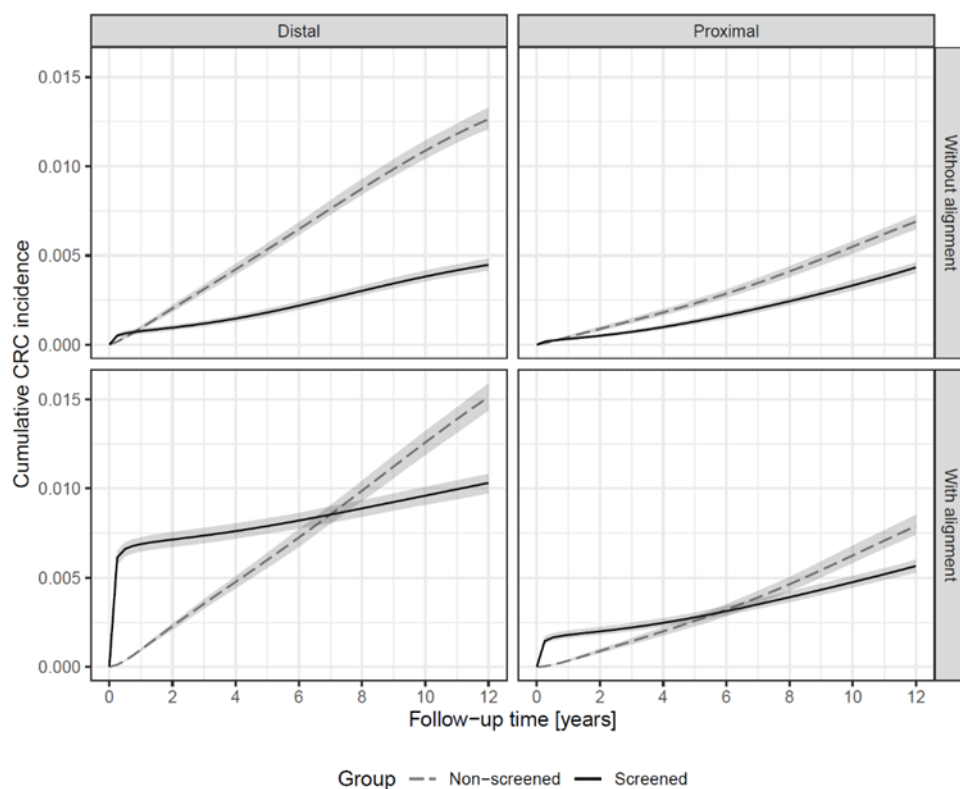

424

425 **Fig. 1:** Adjusted cumulative incidence functions for distal and proximal CRC from the cohort  
426 study design without alignment at time zero (top row) and the cohort study design with  
427 alignment at time zero (bottom row)

428

429

430

431

432

433

434

435

## Supplement

436 **Supplement 1: Cohort and case-control study without alignment at time zero for**  
 437 **different baseline years**  
 438

439 As mentioned in the methods section, for the study designs without alignment at time zero, we  
 440 selected individuals from the source population entering the cohort in 2009. In sensitivity  
 441 analyses, we varied the baseline year, i.e. individuals entering the cohort in 2010 and 2011,  
 442 respectively. The respective results are shown in Table S1 and Figure S1 for the cohort study  
 443 and in Table S2 for the case-control study. For comparison, also the results of the base case  
 444 analysis (baseline year 2009) are shown.

445 *Table S1: Results of cohort study designs without alignment at time zero for different baseline*  
 446 *years.*

| <b>Baseline year</b> |                     | <b>Control group</b> | <b>Screening group</b> | <b>Adjusted relative risk</b> | <b>(95% CI)</b> |
|----------------------|---------------------|----------------------|------------------------|-------------------------------|-----------------|
|                      | Number at risk      | 200,000              | 200,000                |                               |                 |
|                      | Number of CRC cases |                      |                        |                               |                 |
| 2009                 | Distal, n           | 2,472                | 829                    | 0.35                          | (0.32-0.39)     |
|                      | Proximal, n         | 1,290                | 823                    | 0.63                          | (0.57-0.69)     |
| 2010                 | Distal, n           | 2,101                | 709                    | 0.35                          | (0.32-0.39)     |
|                      | Proximal, n         | 1,131                | 702                    | 0.61                          | (0.56-0.68)     |
| 2011                 | Distal, n           | 2,048                | 642                    | 0.33                          | (0.30-0.37)     |
|                      | Proximal, n         | 1,056                | 640                    | 0.54                          | (0.49-0.59)     |

447

448

449

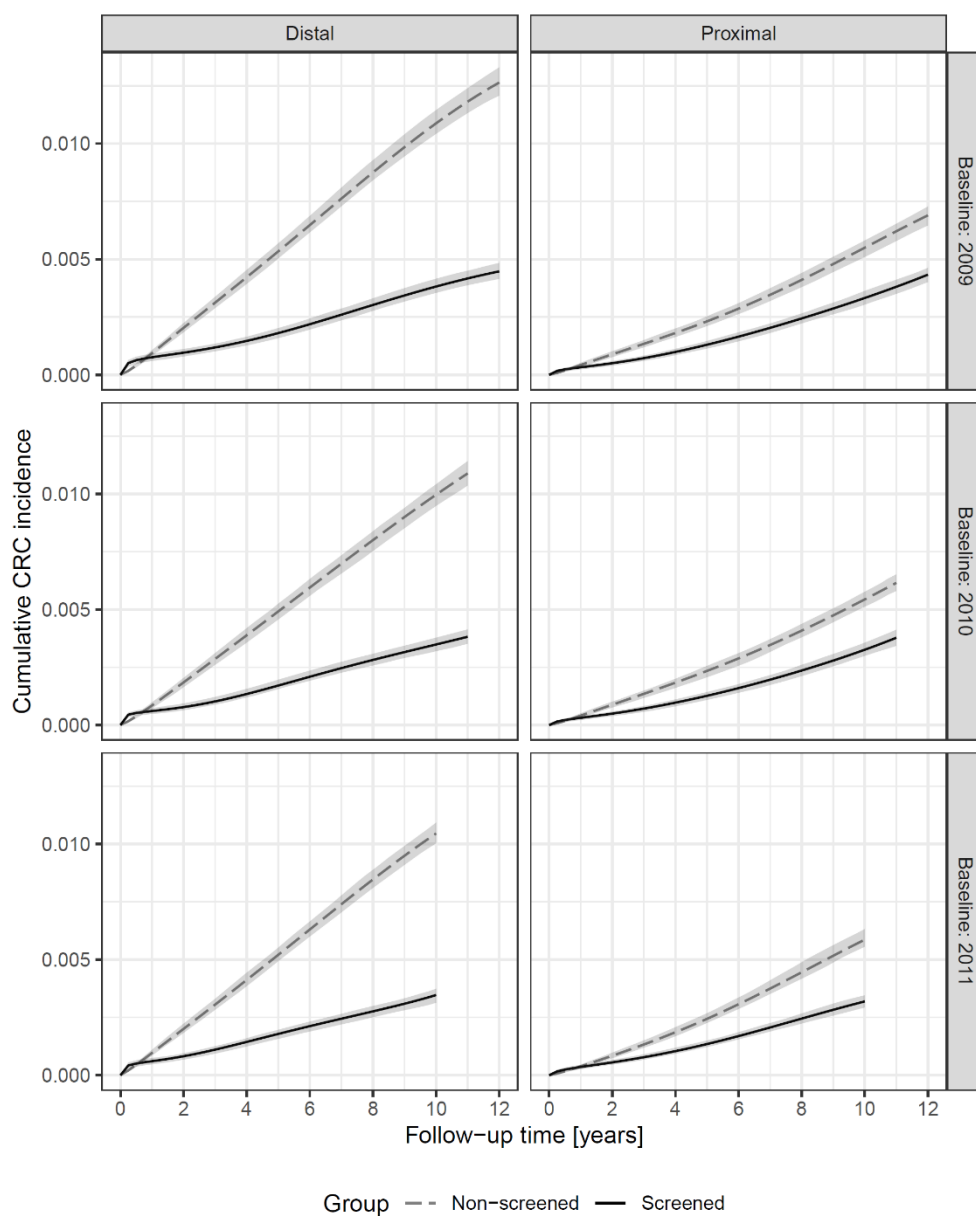

450

451 *Figure S1: Adjusted cumulative incidence functions for distal and proximal CRC from the*  
452 *cohort study design without alignment at time zero for different baseline years.*

453

454

455 *Table S2: Results of case-control designs without alignment at time zero for different baseline*  
 456 *years.*

457

| <b>Site</b>                        | <b>Case status</b> |                 | <b>Adjusted OR<br/>(95% CI)</b> |
|------------------------------------|--------------------|-----------------|---------------------------------|
|                                    | <b>Cases</b>       | <b>Controls</b> |                                 |
| <b>Baseline year 2009</b>          |                    |                 |                                 |
| Number of distal CRCs / controls   | 446                | 2,230           |                                 |
| Thereof exposed                    | 36                 | 653             | 0.23 (0.16-0.33)                |
| Number of proximal CRCs / controls | 302                | 1,510           |                                 |
| Thereof exposed                    | 54                 | 434             | 0.54 (0.39-0.75)                |
| <b>Baseline year 2010</b>          |                    |                 |                                 |
| Number of distal CRCs / controls   | 430                | 2,150           |                                 |
| Thereof exposed                    | 29                 | 607             | 0.19 (0.13-0.29)                |
| Number of proximal CRCs / controls | 264                | 1,320           |                                 |
| Thereof exposed                    | 38                 | 345             | 0.46 (0.32-0.68)                |
| <b>Baseline year 2011</b>          |                    |                 |                                 |
| Number of distal CRCs / controls   | 408                | 2,040           |                                 |
| Thereof exposed                    | 24                 | 500             | 0.20 (0.13-0.31)                |
| Number of proximal CRCs / controls | 254                | 1,270           |                                 |
| Thereof exposed                    | 31                 | 298             | 0.47 (0.31-0.71)                |

458

459

460 **Supplement 2: Cohort and case-control study without alignment at time zero:**  
 461 **considering both screening and diagnostic colonoscopy for the assignment to**  
 462 **exposure groups**  
 463

464 As mentioned in the methods section regarding the study designs without alignment at time  
 465 zero, only screening colonoscopies were considered for the assignment to exposure groups in  
 466 the base case analysis. In a sensitivity analysis, we considered both screening and diagnostic  
 467 colonoscopies for the exposure assignment. The respective results are shown in Table S4 and  
 468 Figure S2 for the cohort study design and in Table S5 for the case-control study.

469

470 *Table S4: Results of cohort study designs without alignment at time zero: sensitivity analyses*  
 471 *considering both screening and diagnostic colonoscopy for the assignment to exposure*  
 472 *groups. For comparison, also the results of the base case analysis are shown.*

|                             | <b>Control group</b> | <b>Screening group</b> | <b>Adjusted relative risk</b> | <b>(95% CI)</b> |
|-----------------------------|----------------------|------------------------|-------------------------------|-----------------|
| <b>Base case analysis</b>   |                      |                        |                               |                 |
| Number at risk              | 200,000              | 200,000                |                               |                 |
| Number of CRC cases         |                      |                        |                               |                 |
| Distal, n                   | 2,472                | 829                    | 0.35                          | (0.32-0.39)     |
| Proximal, n                 | 1,290                | 823                    | 0.63                          | (0.57-0.69)     |
| <b>Sensitivity analysis</b> |                      |                        |                               |                 |
| Number at risk              | 200,000              | 200,000                |                               |                 |
| Number of CRC cases         |                      |                        |                               |                 |
| Distal, n                   | 2,657                | 982                    | 0.40                          | (0.37-0.44)     |
| Proximal, n                 | 1,348                | 893                    | 0.66                          | (0.60-0.72)     |

473

474

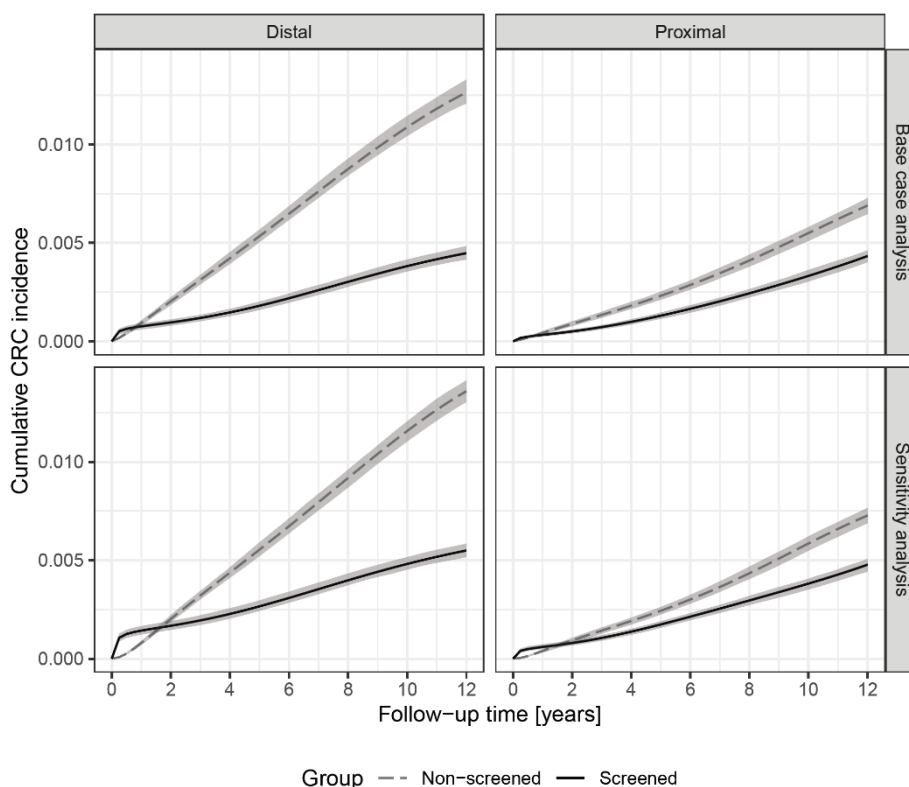

475

476 *Figure S2: Adjusted cumulative incidence functions for distal and proximal CRC from the cohort*  
 477 *study design without alignment at time zero: sensitivity analysis considering both screening*  
 478 *and diagnostic colonoscopy for the assignment to exposure groups. For comparison, also the*  
 479 *cumulative incidence functions of the base case analysis are shown.*

480

481 *Table S5: Results of case-control designs without alignment at time zero: sensitivity analyses*  
 482 *considering both screening and diagnostic colonoscopy for the assignment to exposure*  
 483 *groups. For comparison, also the results of the base case analysis are shown.*

484

| <b>Site</b>                        | <b>Case status</b> |                 | <b>Adjusted OR<br/>(95% CI)</b> |
|------------------------------------|--------------------|-----------------|---------------------------------|
|                                    | <b>Cases</b>       | <b>Controls</b> |                                 |
| <b>Base case analysis</b>          |                    |                 |                                 |
| Number of distal CRCs / controls   | 446                | 2,230           |                                 |
| Thereof exposed                    | 36                 | 653             | 0.23 (0.16-0.33)                |
| Number of proximal CRCs / controls | 302                | 1,510           |                                 |
| Thereof exposed                    | 54                 | 434             | 0.54 (0.39-0.75)                |
| <b>Sensitivity analysis</b>        |                    |                 |                                 |
| Number of distal CRCs / controls   | 446                | 2,230           |                                 |
| Thereof exposed                    | 60                 | 1,020           | 0.20 (0.15-0.26)                |
| Number of proximal CRCs / controls | 302                | 1,510           |                                 |
| Thereof exposed                    | 82                 | 685             | 0.44 (0.33-0.58)                |

485

486 **Supplement 3: Structural explanation of the bias inherent to study designs using pre-**  
 487 **baseline information for the assignment to exposure groups**

488 For simplicity, we divide time into three periods  $t \in \{-1, 0, 1\}$  with  $t = -1$  being the pre-baseline  
 489 period,  $t = 0$  the baseline and  $t = 1$  the post-baseline or follow-up period. Let  $E_t \in \{0, 1\}$   
 490 described a person's exposure to screening colonoscopy at time  $t$ . Let  $P_t \in \{0, 1\}$  indicate the  
 491 presence of colorectal precursors at time  $t$  and  $C_t \in \{0, 1\}$  the onset of preclinical CRC by time  
 492  $t$ . Let  $Y_t \in \{0, 1\}$  indicate a diagnosis of colorectal cancer by time  $t$ . Finally, let  $S = 1$  denote  
 493 selection into the study cohort.

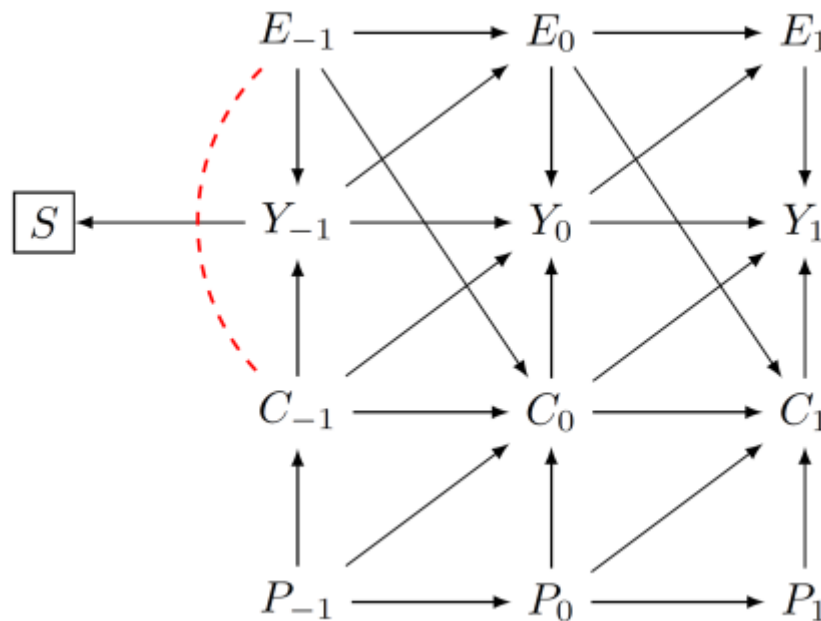

494  
 495 *Figure S3: DAG of bias resulting from violation of alignment at time zero in the form of exposure assessment based*  
 496 *on pre-baseline information.*

497 As shown in Figure S3, at time point  $t$  the causal mechanism that leads to a diagnosis of CRC  
 498 is as follows: Precursors  $P_t$  lead to the development of CRC  $C_t$ , which in turn progress to the  
 499 outcome of interest, CRC diagnosis  $Y_t$ . At the same time, exposure to screening colonoscopy  
 500  $E_t$  leads to CRC diagnosis  $Y_t$  at the same time point, if the disease is present. Furthermore,  
 501 exposure at time  $t$  prevents disease onset at the later time  $t + 1$  by removing precursor stages  
 502 present at time  $t$ .

503 Importantly, the variable  $Y_t$  is a collider variable on the path  $P_t \rightarrow C_t \rightarrow Y_t \leftarrow E_t$ . When cohort  
 504 selection  $S$  is based on this collider, a non-causal association is introduced between  $E_t$  and  $C_t$ .  
 505 If the cohort selection process excludes individuals with CRC diagnosis before baseline ( $Y_{-1}$ )  
 506 while including individuals with past exposure  $E_{-1}$  in the exposed group of the analysis dataset,  
 507 the unexposed group appears to have a higher CRC incidence. Individuals who were screened  
 508 in the past and had prevalent CRC received a diagnosis and were filtered out of the study  
 509 cohort. Individuals who were screened in the past and did not have prevalent CRC are included  
 510 in the exposed group. No such selection takes place in the unexposed group, where individuals  
 511 must not have had any screening colonoscopy before baseline. Therefore, there is a non-  
 512 causal association between exposure before baseline and prevalent, undiagnosed CRC before  
 513 baseline. This non-causal association means that there are now open backdoor paths from



514 exposure before baseline to the study outcome at later time points. The resulting bias,  
515 therefore, can be expressed as a form of collider stratification bias.

516 Importantly, the strength of the bias will depend on the prevalence of  $C_{-1}$ . If, conceptually, the  
517 prevalence of CRC before baseline were to approach zero, no such selection would take place.  
518 In the age group under study here, the prevalence of proximal CRC before baseline will be  
519 much lower than the prevalence of distal CRC before baseline, which means that this bias will  
520 impact the effect estimate for distal CRC more severely.

521

522

523 **Supplement 4: Illustration of the mechanism underlying the misallocation of screen-**  
524 **detected CRCs in case-control studies without alignment at time zero**

525 Figure S4 illustrates the mechanism that underlies the misallocation of screen-detected CRCs  
526 in case-control studies without alignment at time zero, resulting in an overestimate of the  
527 effectiveness of screening colonoscopy. First, let us imagine a hypothetical RCT investigating  
528 the effectiveness of screening colonoscopy on CRC incidence. At baseline, screening-naïve  
529 persons are randomly assigned to either the screening or the control arm. Analysing this data  
530 as a case-control study without alignment at time zero would mean that for CRCs occurring in  
531 both arms, it is assessed whether they had a colonoscopy *before* CRC diagnosis. Given that  
532 screen-detected CRCs did not have a colonoscopy *before* CRC diagnosis, they are assigned  
533 (post-baseline, i.e. after randomization) to the control arm and are thereby classified as  
534 unexposed. This overestimates the effectiveness of screening given that CRCs accumulate in  
535 the control group (unexposed group). Given that screen-detected CRCs are more frequent in  
536 the distal colorectum, the resulting bias affects distal CRC more severely than proximal CRC.

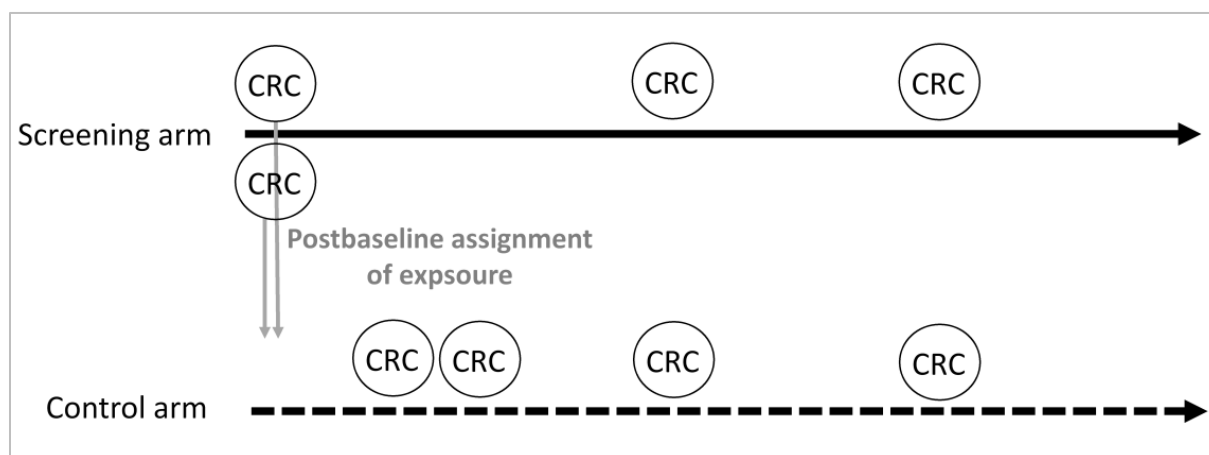

537  
538 *Figure S4: Illustration of the mechanism of misallocation of screen-detected CRCs in case-control studies without*  
539 *alignment at time zero*

540 Of note, in published case-control studies investigating the effectiveness of screening  
541 colonoscopy based on primary data, selection bias in the control arm (higher prevalence of  
542 screening colonoscopy as compared to the general population) can—as an additional  
543 mechanism—also contribute to overestimating the effectiveness of screening colonoscopy, but  
544 it is not expected that this bias leads to a difference in the effectiveness by site.

545 In our case-control study without alignment at time zero, there was a second mechanism  
546 leading to overestimating the effectiveness of screening colonoscopy due a compromise we  
547 had to make because of the left truncation of our data. Specifically, we had to select CRC  
548 cases diagnosed in 2018-2020 from those entering the cohort in 2009 (see methods section)  
549 in order to be able to assess exposure in the 10 years prior to CRC diagnosis. CRCs diagnosed  
550 between 2009 and 2017 in the context of screening, which are more often in the distal than in  
551 the proximal colon, were not included in the final set of cases, i.e. distal CRCs exposed to  
552 screening colonoscopy were underrepresented in the final set of cases. We conducted  
553 additional analyses to disentangle the effect of both mechanism (data not shown), which did  
554 not change our conclusion, i.e. that the mechanism described in Figure S4 (also) leads to an  
555 artificial difference in the effectiveness of colonoscopy by site.

556 **Supplement 5: Bias due to post-baseline information for exposure assignment in a**  
557 **cohort study**

558 In the cohort study by Nishihara et al. the assessment of eligibility criteria (e.g. no prior cancer  
559 except for nonmelanoma skin cancer, no prior endoscopy) as well as the start of follow-up was  
560 in 1988 (baseline). As part of a questionnaire administered every 2 years, participants were  
561 then asked whether they had undergone either sigmoidoscopy or colonoscopy and, if so, the  
562 reason for the investigation and whether there was a diagnosis of colorectal polyps. This  
563 means that the assignment to exposure groups used information after the assessment of  
564 eligibility and the start of follow-up, and it was updated every two years, i.e. post-baseline  
565 information was used to determine exposure. The outcome was the incidence of colorectal  
566 cancer, which was compared between participants without a lower endoscopy (control group),  
567 participants with a polypectomy, participants with a negative sigmoidoscopy and participants  
568 with a negative colonoscopy.

569 The mechanism described for the case-control study without alignment at time zero also  
570 applies to this design. In each two-year time interval CRCs detected in persons who had their  
571 first colonoscopy during this two-year time interval are—per definition—assigned to the  
572 unexposed group as they had no colonoscopy prior to CRC diagnosis. This overestimates the  
573 effectiveness of screening because CRCs are filtered to the unexposed group. As the majority  
574 of screen-detected CRCs are in the distal colon, this bias predominantly affects CRCs in the  
575 distal colon and thus leads to an artificial difference in the effectiveness of colonoscopy by site.

576

577 **Supplement 6: Post-colonoscopy CRC diagnoses**

578

579 For the cohort analysis with alignment at time zero, we quantified the occurrence of post-  
580 colonoscopy CRC diagnoses occurring in the screening arm and assessed their site  
581 distribution. CRC diagnoses with a screening colonoscopy in the same calendar quarter or in  
582 the 180 days before CRC diagnosis were considered screen-detected and were not counted  
583 as post-colonoscopy CRC. The frequencies and percentages are given in the below Table:

| <i>Site</i>  | <i>N</i> | <i>%</i> |
|--------------|----------|----------|
| Distal CRC   | 541      | 39.3     |
| Proximal CRC | 633      | 46.0     |
| Both/unknown | 203      | 14.7     |
| Total        | 1377     |          |

584

585
